# Supplementary figures and images for: Tautomer identification troubles: the molecular structure of itaconic and citraconic anhydride revealed by rotational spectroscopy
Source: Royal Society of Chemistry journal article supplement (doi:10.1039/d5cp00389j), 2025-01-01

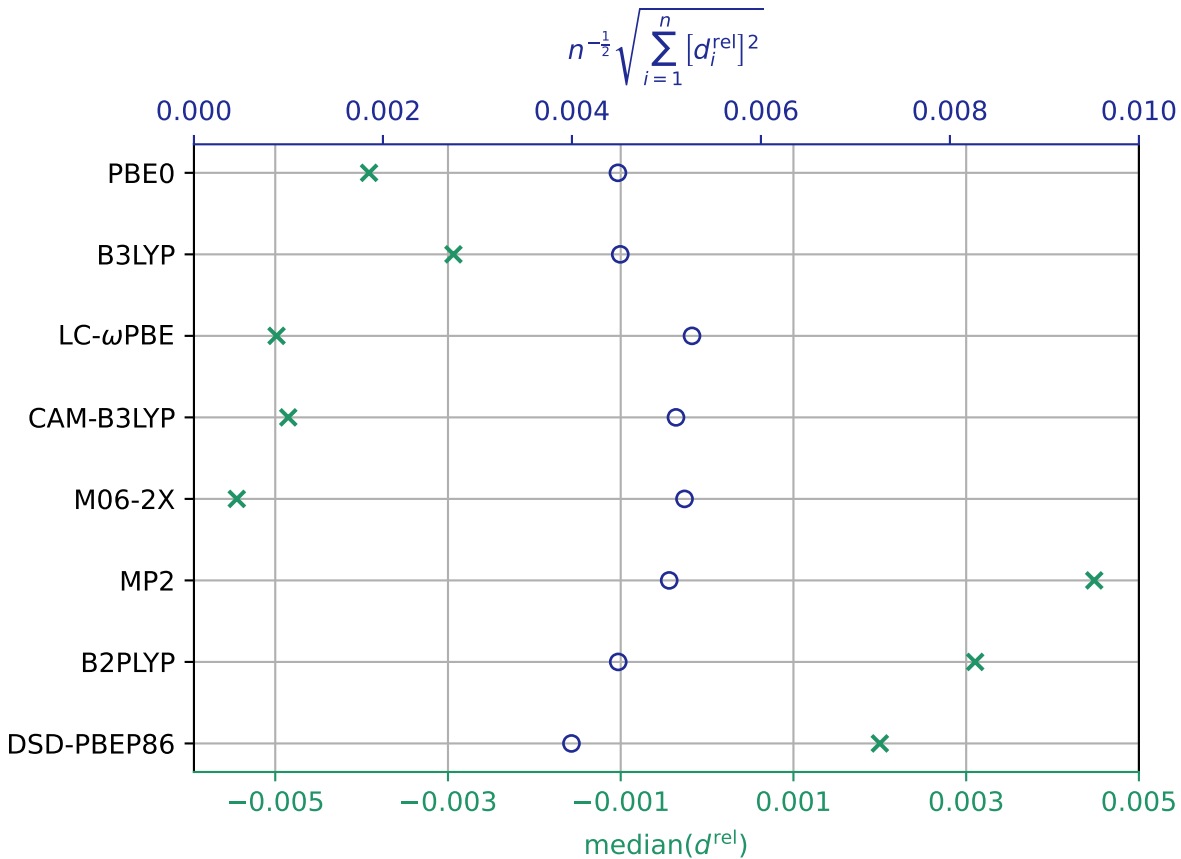

Supplement: d5cp00389j2.zip [file d5cp00389j2.zip]

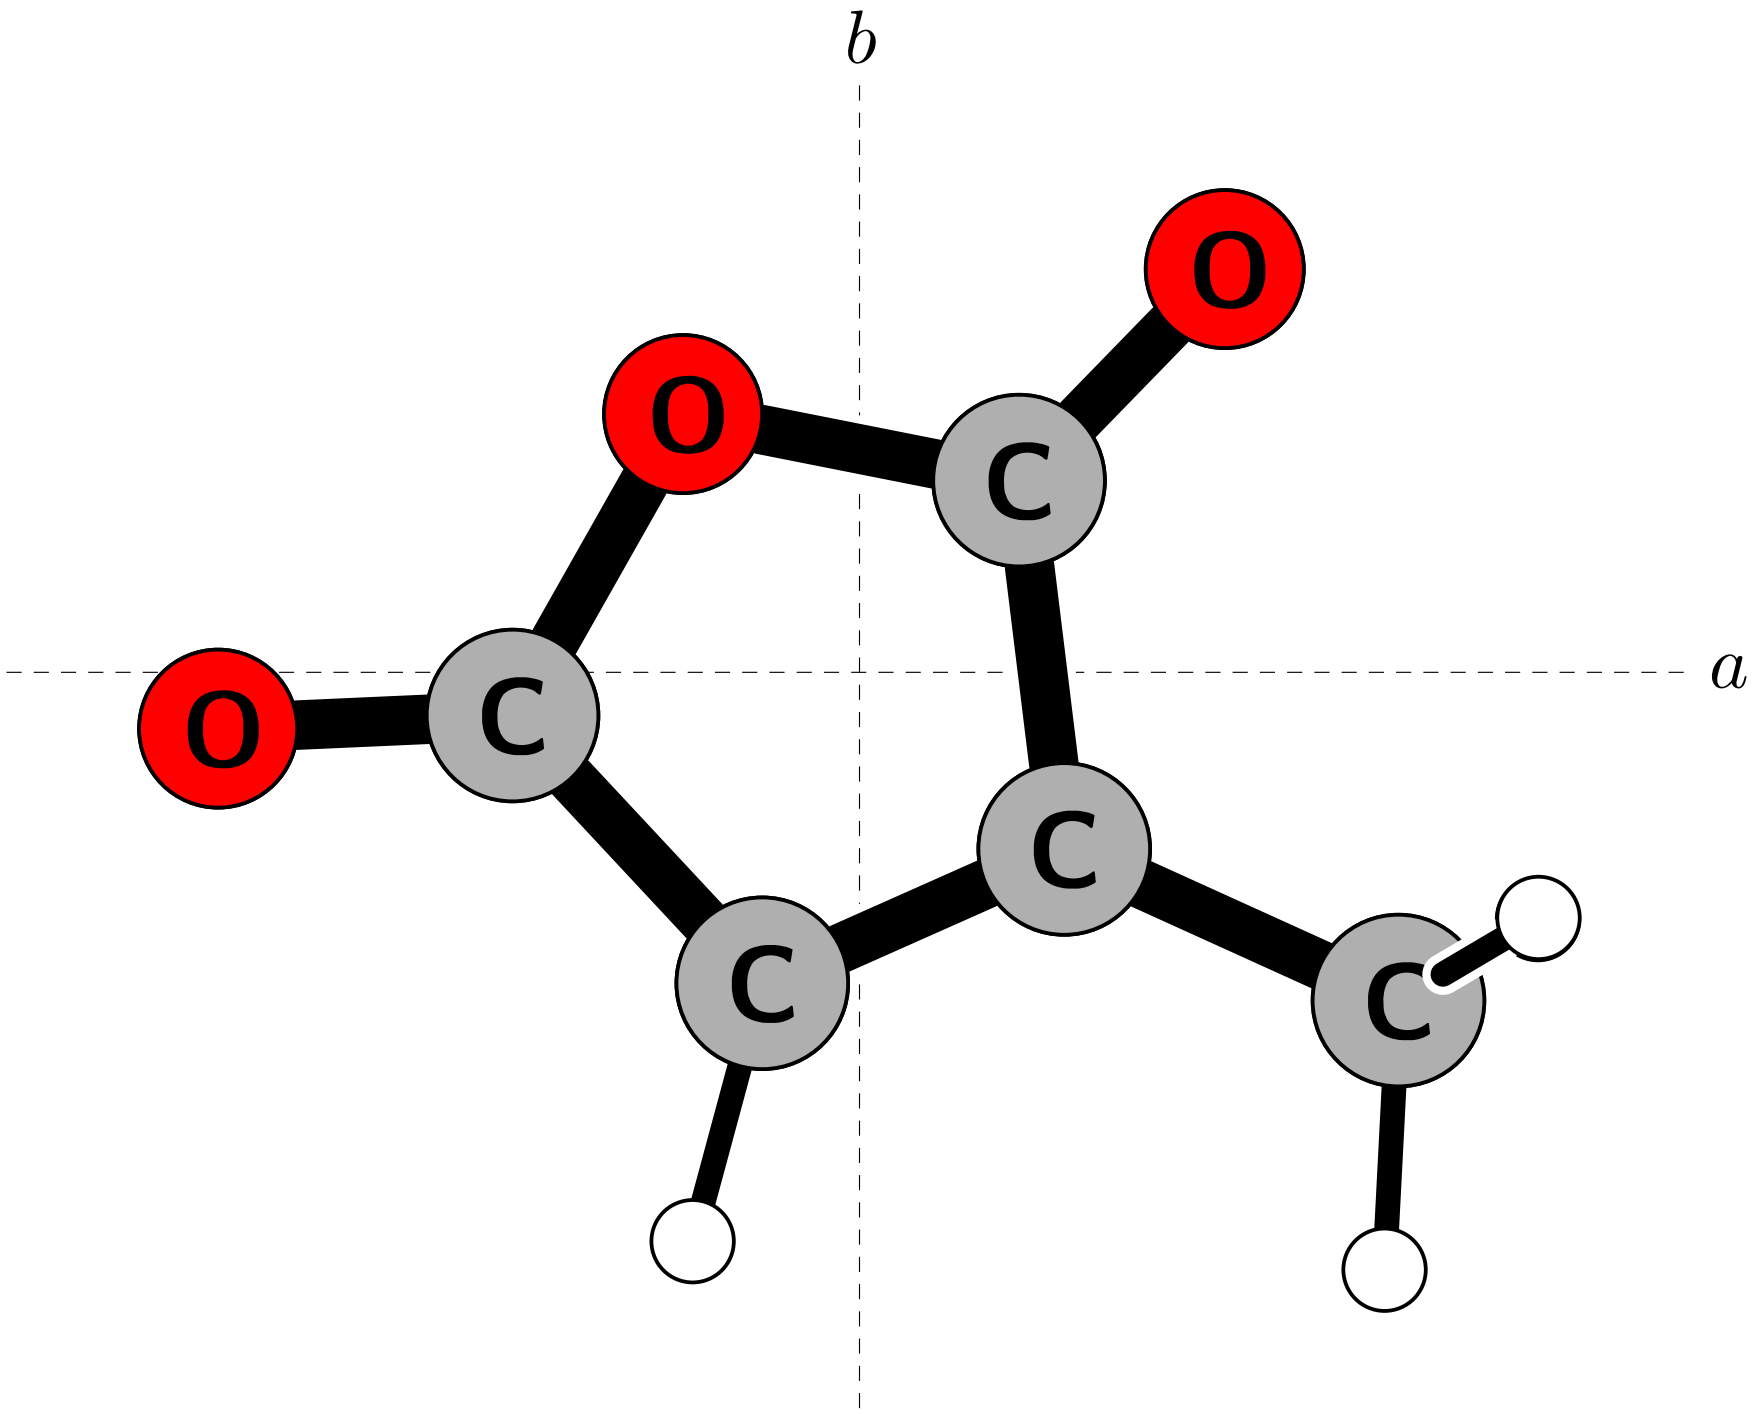

Supplement: d5cp00389j2.zip [file d5cp00389j2.zip]

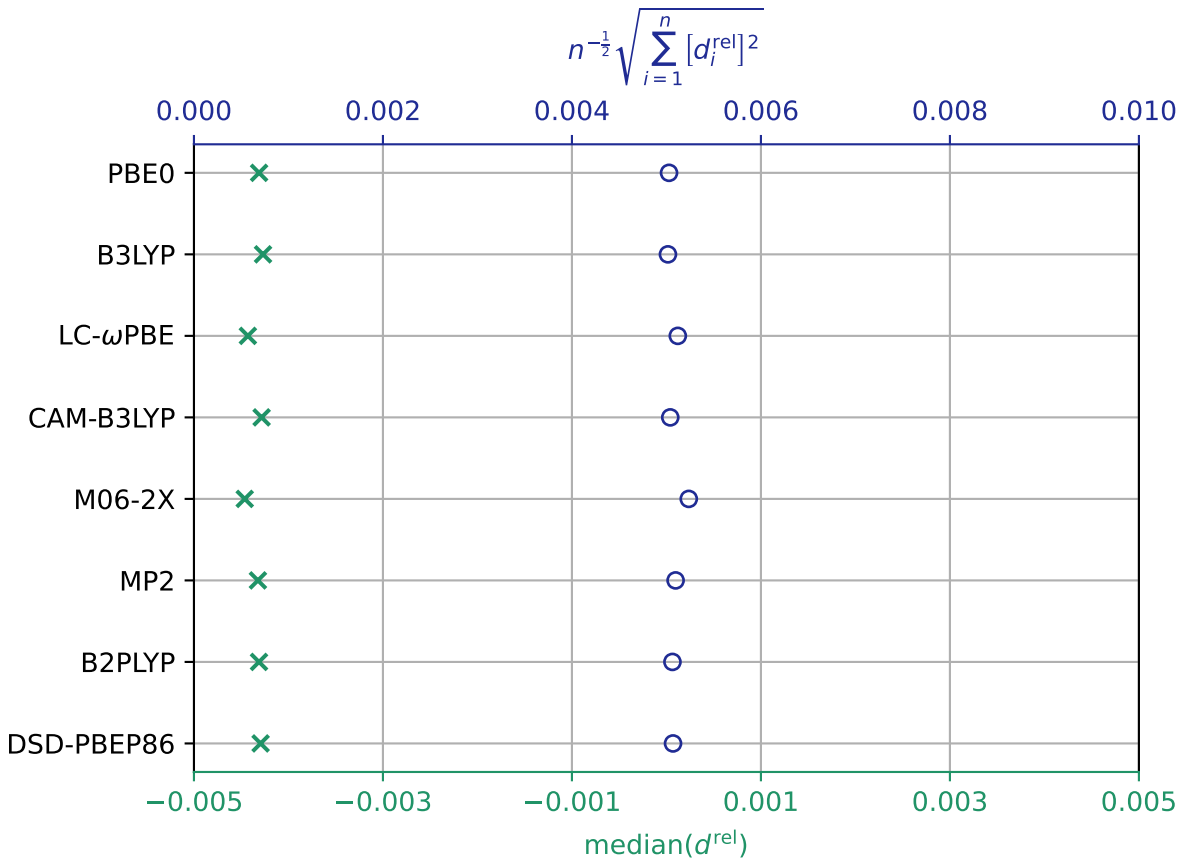

Supplement: d5cp00389j2.zip [file d5cp00389j2.zip]

$$n^{-\frac{1}{2}} \sqrt{\sum_{i=1}^n [\mathcal{L}_i^{\text{rel}}]^2}$$

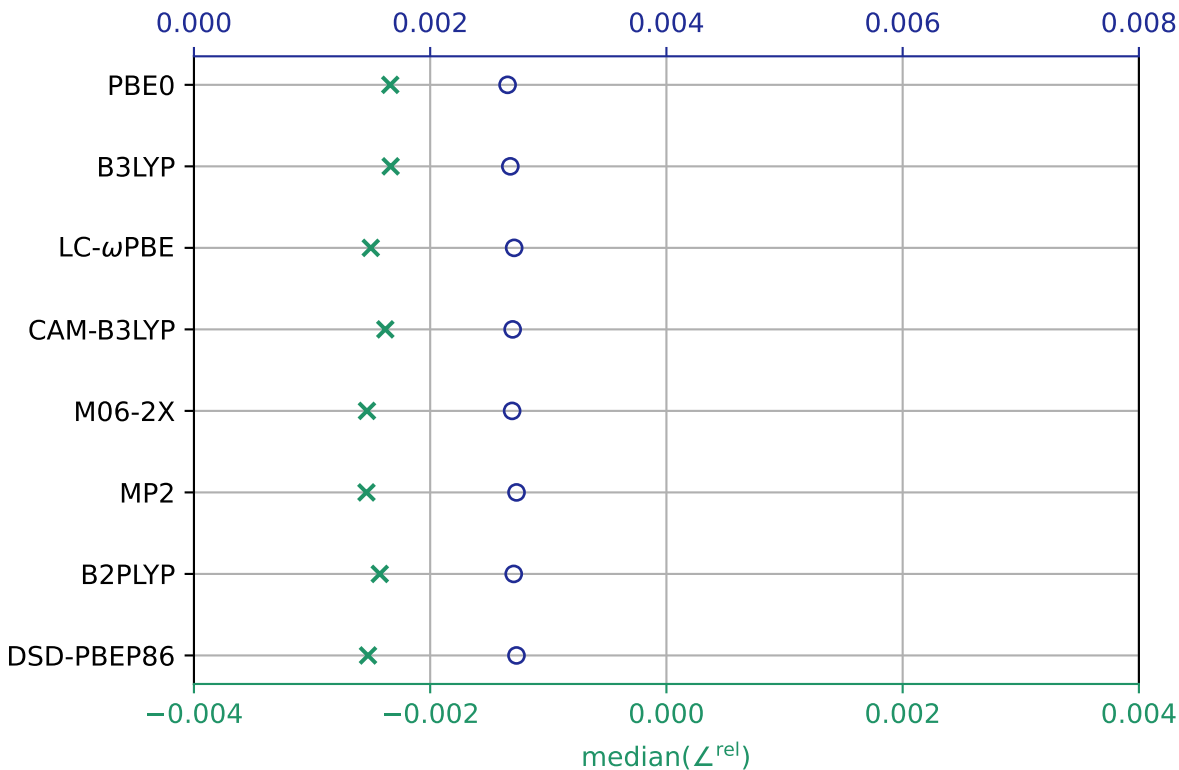

Supplement: d5cp00389j2.zip [file d5cp00389j2.zip]

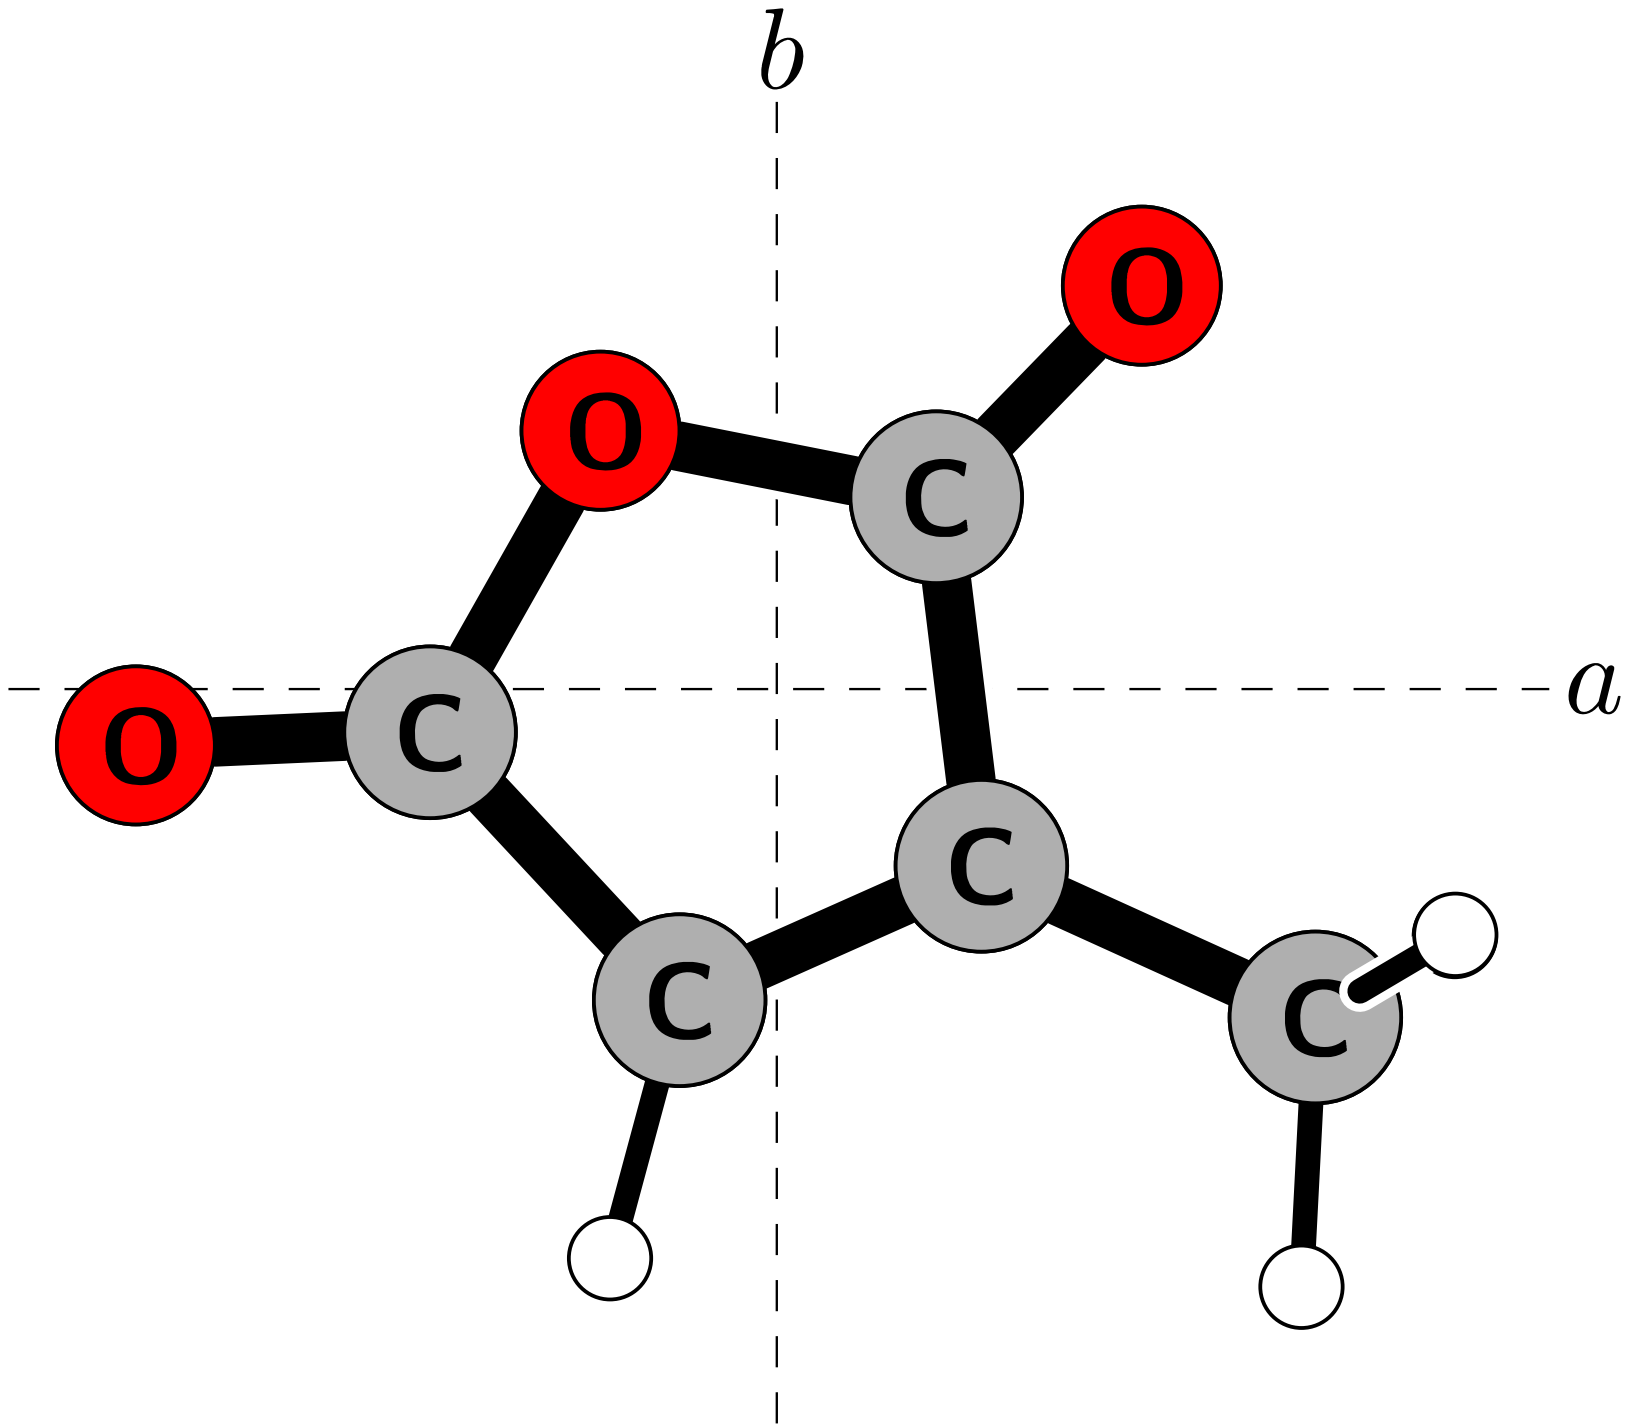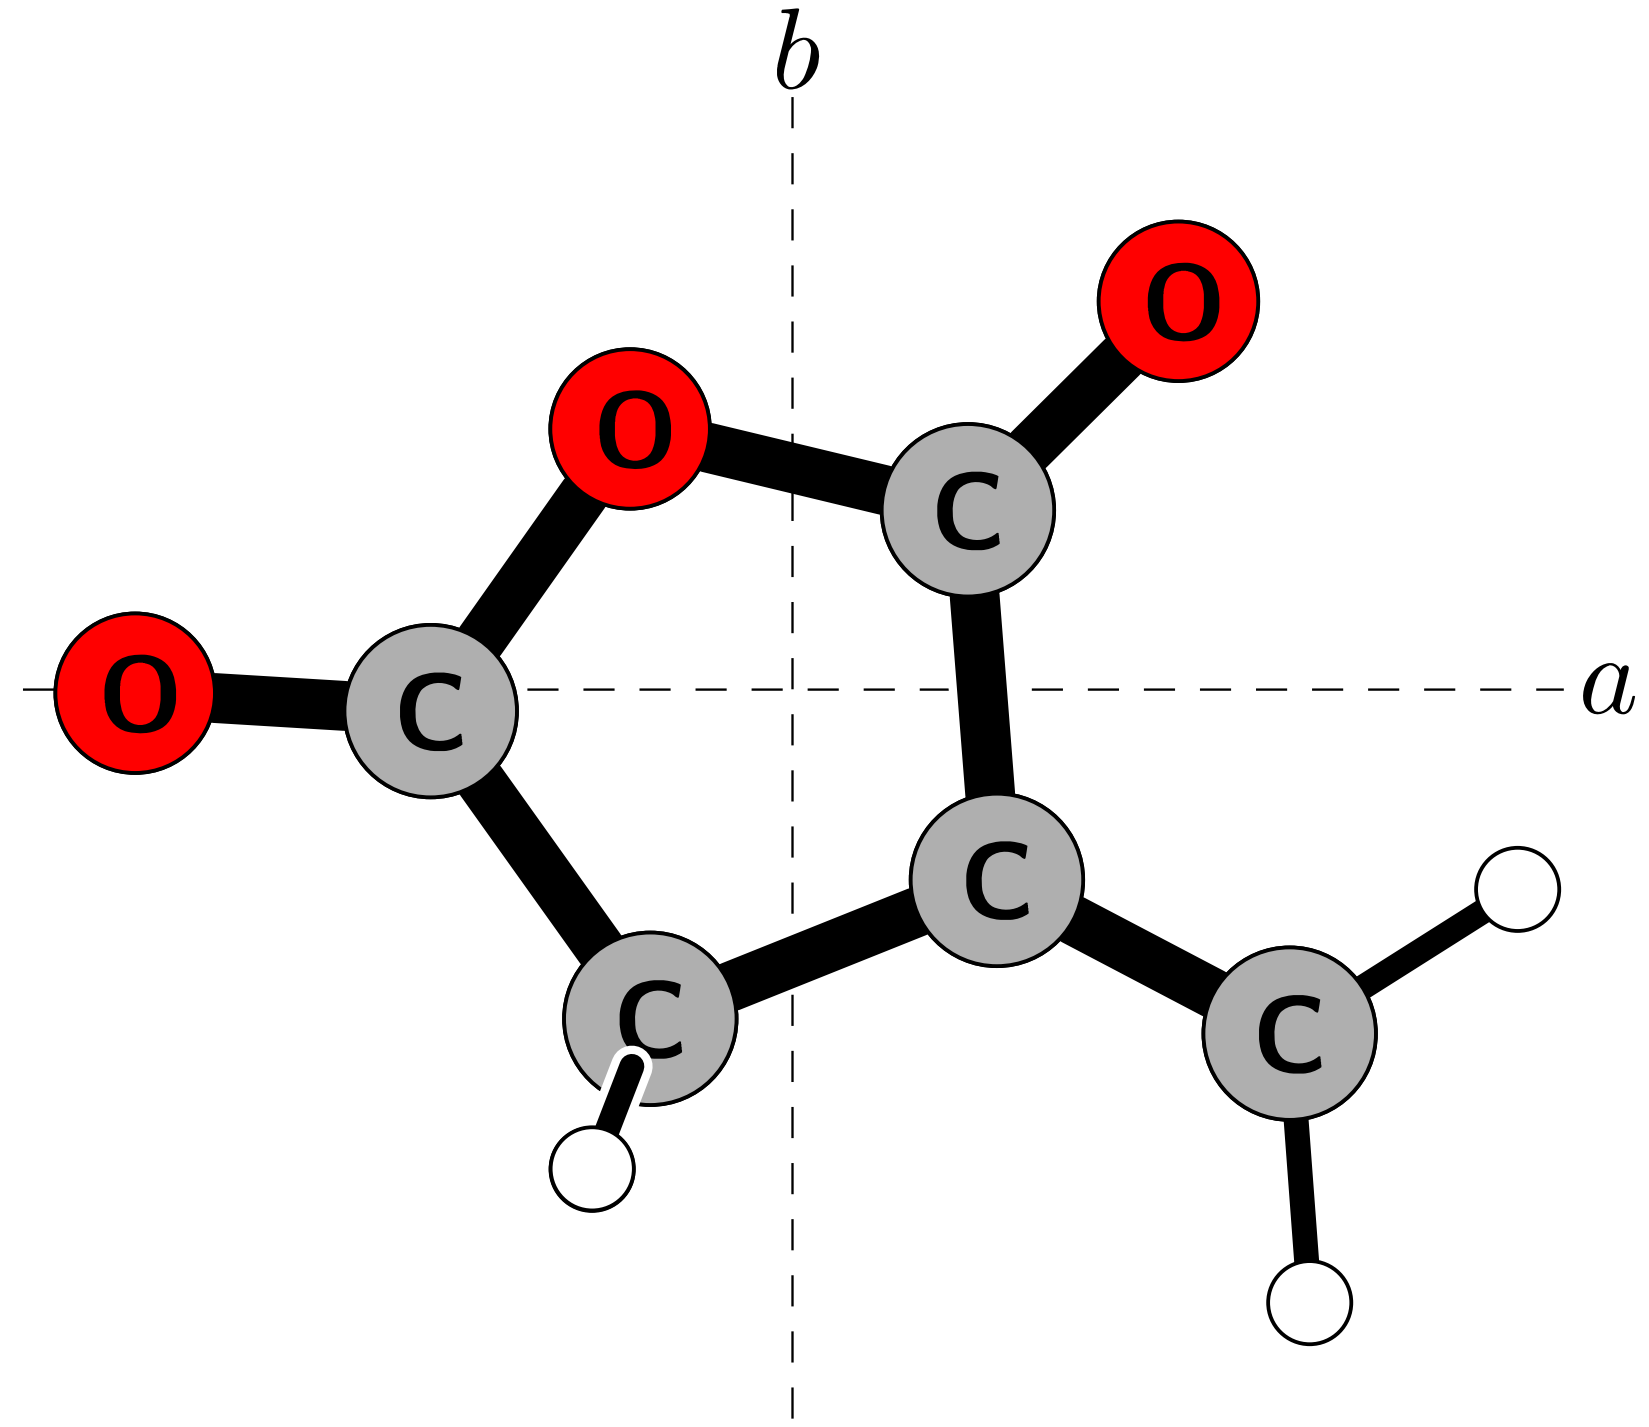

Supplement: d5cp00389j2.zip [file d5cp00389j2.zip]

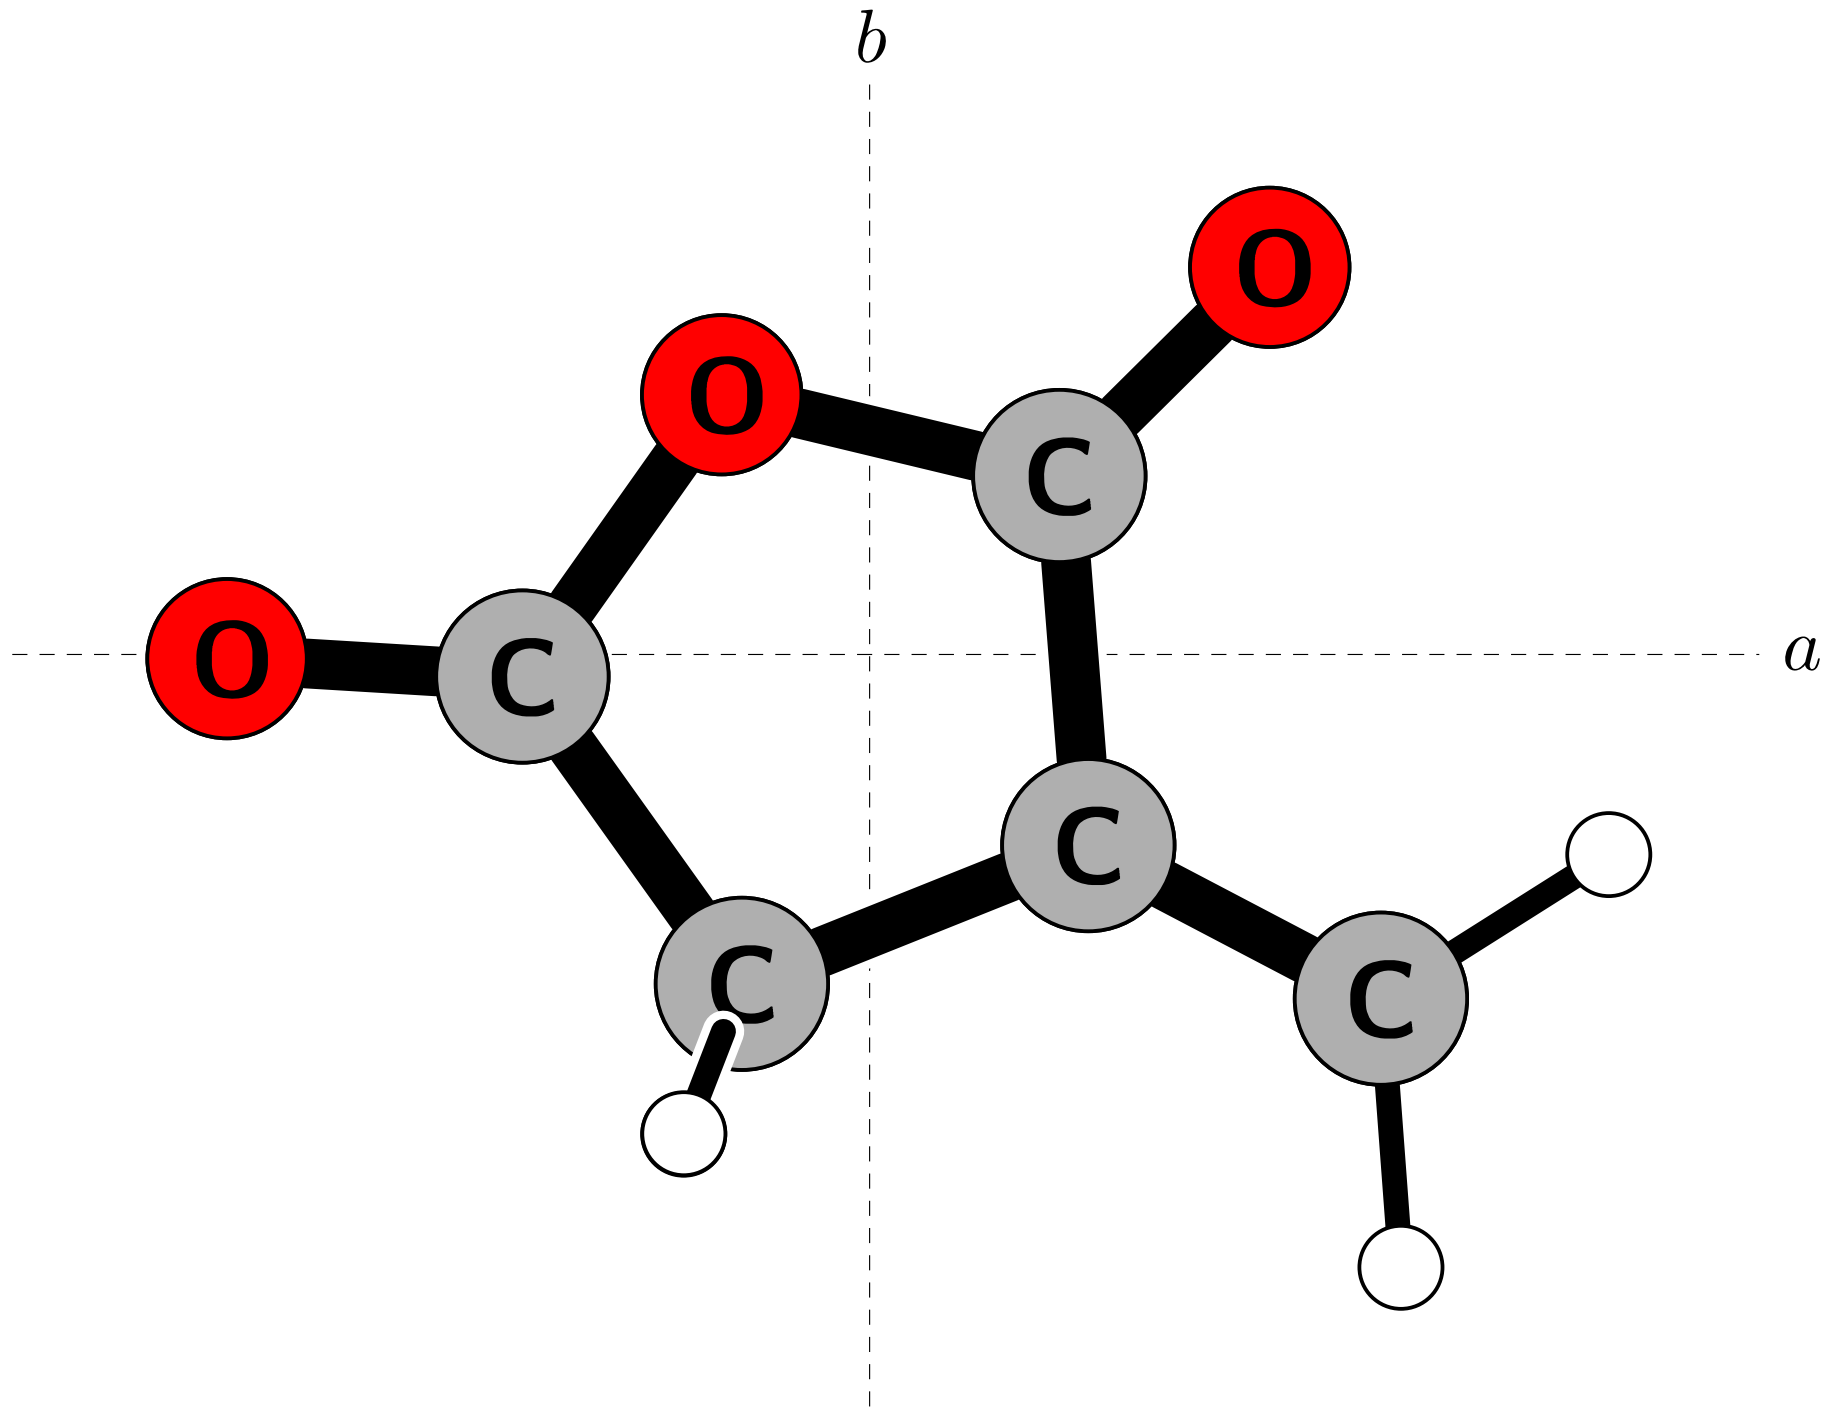

Supplement: d5cp00389j2.zip [file d5cp00389j2.zip]

$$n^{-\frac{1}{2}} \sqrt{\sum_{i=1}^n [\mathcal{L}_i^{\text{rel}}]^2}$$

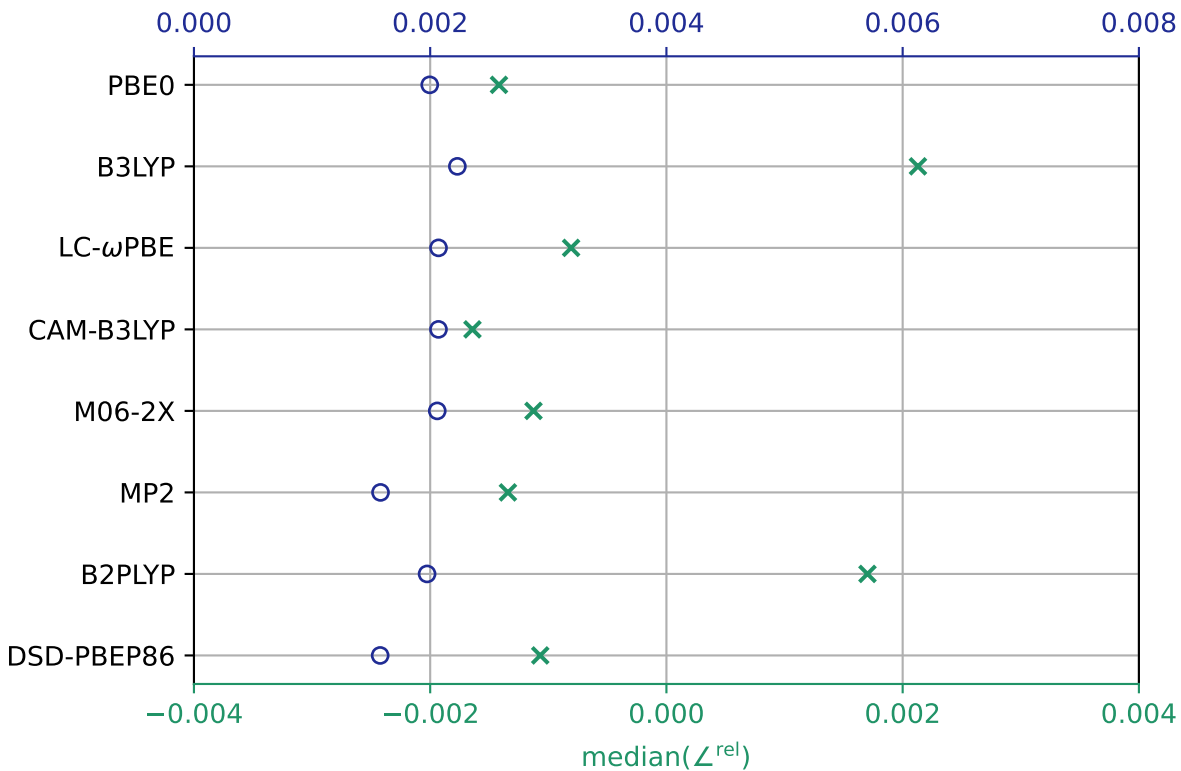

Supplement: d5cp00389j2.zip [file d5cp00389j2.zip]
